# Supplementary material
Source: Springer Nature journal article supplement (https://www.springermedizin.de/resource/supplementary/12885_2010_2771_MOESM1_ESM.pdf/9461932)

**A****H&E staining**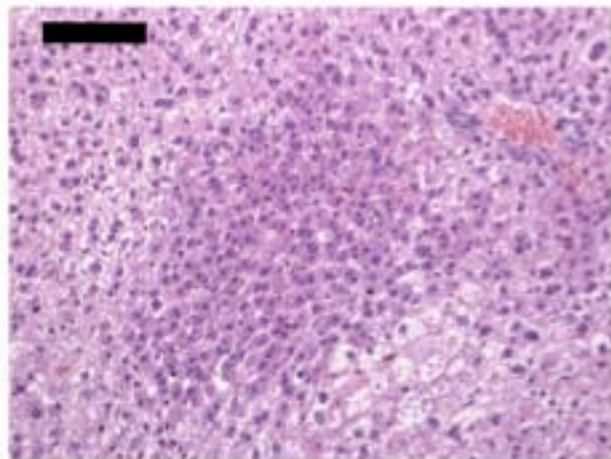**B****FCA**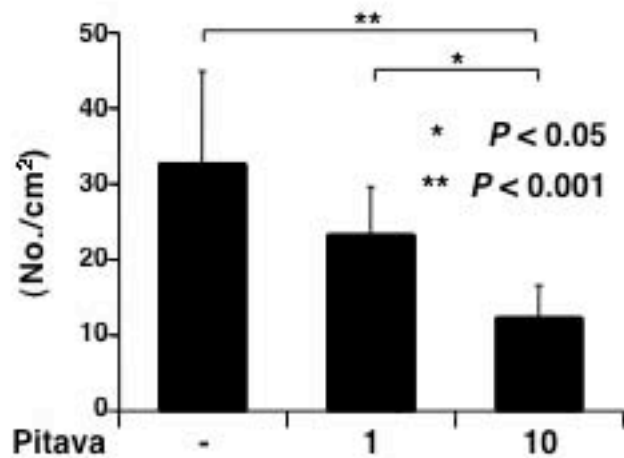

Supplement: MOESM1 [file 9461932]
